# Supplementary material
Source: PubMed Central journal article supplement (PMC4568833)
Supplement: ic5b00751_si_001.pdf [file ic5b00751_si_001.pdf]

## Supporting Information

# Broken-Symmetry DFT Computations for the Reaction Pathway of IspH, an Iron-Sulfur Enzyme in Pathogenic Bacteria

*Patrick G. Blachly,<sup>1,\*</sup> Gregory M. Sandala,<sup>2</sup> Debra Ann Giammona,<sup>3</sup> Donald Bashford,<sup>3</sup>*

*J. Andrew McCammon,<sup>1,4,5</sup> Louis Noodleman<sup>6,\*</sup>*

<sup>1</sup> Department of Chemistry & Biochemistry, University of California San Diego, La Jolla, CA 92093-0365, USA

<sup>2</sup> Department of Chemistry and Biochemistry, Mount Allison University, 63C York Street, Sackville, New Brunswick E4L 1G8, Canada

<sup>3</sup> Department of Structural Biology, St. Jude Children's Research Hospital, 262 Danny Thomas Place, Memphis, TN 38105, USA

<sup>4</sup> Department of Pharmacology, University of California San Diego, La Jolla, CA 92093-0365, USA

<sup>5</sup> Howard Hughes Medical Institute, University of California San Diego, La Jolla, CA 92093-0365, USA

<sup>6</sup> Department of Integrative Structural and Computational Biology, CB213, The Scripps Research Institute, 10550 North Torrey Pines Road, La Jolla, CA 92037, USA

\*Correspondence to:

Patrick G. Blachly  
Department of Chemistry & Biochemistry  
University of California, San Diego  
9500 Gilman Drive, Mail code 0365  
La Jolla, CA 92093-0365  
858-822-2771 (phone)  
pblachly@mccammon.ucsd.edu

Louis Noodleman  
Department of Integrative Structural and Computational Biology  
The Scripps Research Institute  
TPC15, 10550 North Torrey Pines Road  
La Jolla, CA 92037  
858-784-2840 (phone)  
lou@scripps.edu

**Table S1.** Geometric parameters for the lowest-energy  $1e^-$  reduced RO(H)-bound states that are omitted from Table 2 in text. Bond lengths are shown in Å.

|                              | Exp   | $RO^{\ominus}P^{\ominus}E^{\text{H}}$ |       |             | $RO^{\ominus}P^{\text{H}}E^{\text{H}}$ |       |             | $RO^{\text{H}}P^{\ominus}E^{\text{H}}$ |       |             |
|------------------------------|-------|---------------------------------------|-------|-------------|----------------------------------------|-------|-------------|----------------------------------------|-------|-------------|
|                              |       | Ox                                    | Red   | $\Delta$    | Ox                                     | Red   | $\Delta$    | Ox                                     | Red   | $\Delta$    |
| <b>Cluster bond lengths:</b> |       |                                       |       |             |                                        |       |             |                                        |       |             |
| Fe1 – S5                     | 2.344 | 2.275                                 | 2.295 | 0.02        | 2.281                                  | 2.337 | <b>0.06</b> | 2.200                                  | 2.245 | 0.04        |
| Fe1 – S6                     | 2.393 | 2.351                                 | 2.369 | 0.02        | 2.351                                  | 2.337 | -0.01       | 2.282                                  | 2.267 | -0.02       |
| Fe1 – S7                     | 2.364 | 2.378                                 | 2.395 | 0.02        | 2.370                                  | 2.380 | 0.01        | 2.319                                  | 2.324 | 0.01        |
| Fe2 – S5                     | 2.217 | 2.340                                 | 2.310 | -0.03       | 2.347                                  | 2.347 | 0.00        | 2.328                                  | 2.333 | 0.00        |
| Fe2 – S6                     | 2.186 | 2.212                                 | 2.260 | <b>0.05</b> | 2.213                                  | 2.213 | 0.00        | 2.206                                  | 2.213 | 0.01        |
| Fe2 – S8                     | 2.181 | 2.385                                 | 2.427 | 0.04        | 2.380                                  | 2.409 | 0.03        | 2.357                                  | 2.395 | 0.04        |
| Fe3 – S5                     | 2.319 | 2.328                                 | 2.336 | 0.01        | 2.330                                  | 2.330 | 0.00        | 2.305                                  | 2.328 | 0.02        |
| Fe3 – S7                     | 2.281 | 2.240                                 | 2.284 | 0.04        | 2.239                                  | 2.246 | 0.01        | 2.240                                  | 2.258 | 0.02        |
| Fe3 – S8                     | 2.306 | 2.377                                 | 2.400 | 0.02        | 2.372                                  | 2.402 | 0.03        | 2.361                                  | 2.382 | 0.02        |
| Fe4 – S6                     | 2.308 | 2.321                                 | 2.331 | 0.01        | 2.322                                  | 2.335 | 0.01        | 2.326                                  | 2.321 | 0.00        |
| Fe4 – S7                     | 2.217 | 2.320                                 | 2.321 | 0.00        | 2.323                                  | 2.301 | -0.02       | 2.322                                  | 2.307 | -0.01       |
| Fe4 – S8                     | 2.276 | 2.279                                 | 2.305 | 0.03        | 2.280                                  | 2.349 | <b>0.07</b> | 2.241                                  | 2.301 | <b>0.06</b> |
| Fe2 – S <sub>C12</sub>       | 2.283 | 2.305                                 | 2.339 | 0.03        | 2.303                                  | 2.364 | <b>0.06</b> | 2.256                                  | 2.309 | <b>0.05</b> |
| Fe3 – S <sub>C197</sub>      | 2.285 | 2.314                                 | 2.328 | 0.01        | 2.306                                  | 2.361 | <b>0.05</b> | 2.275                                  | 2.330 | <b>0.06</b> |
| Fe4 – S <sub>C96</sub>       | 2.264 | 2.321                                 | 2.373 | <b>0.05</b> | 2.314                                  | 2.356 | 0.04        | 2.295                                  | 2.356 | <b>0.06</b> |
| <b>HMBPP bond lengths:</b>   |       |                                       |       |             |                                        |       |             |                                        |       |             |
| Fe1 – O <sub>C4</sub>        | 2.046 | 1.891                                 | 1.930 | 0.04        | 1.899                                  | 1.934 | 0.03        | 2.214                                  | 2.257 | 0.04        |
| Fe1 – C <sub>3</sub>         | 3.039 | 3.497                                 | 3.497 | 0.00        | 3.406                                  | 3.396 | -0.01       | 3.531                                  | 3.573 | 0.04        |
| Fe1 – C <sub>2</sub>         | 2.913 | 3.136                                 | 3.156 | 0.02        | 3.107                                  | 3.086 | -0.02       | 3.272                                  | 3.304 | 0.03        |

**Table S2.** Net spin populations (NSPs) computed for the lowest-energy,  $1e^-$  reduced RO(H)-bound valence isomers not included in Table 3 in the text.

|                        | RO <sup>-</sup> P <sup>-</sup> E <sup>H</sup> |                                 |              |        |                                 |              |
|------------------------|-----------------------------------------------|---------------------------------|--------------|--------|---------------------------------|--------------|
|                        | OX                                            | $\alpha\beta\beta\alpha$<br>RED | $\Delta$ NSP | OX     | $\beta\alpha\alpha\beta$<br>RED | $\Delta$ NSP |
| <b>Fe1</b>             | 3.355                                         | 3.439                           | 0.085        | -3.356 | -3.253                          | 0.102        |
| <b>Fe2</b>             | -3.279                                        | -3.150                          | 0.129        | 3.279  | 3.358                           | 0.079        |
| <b>Fe3</b>             | -3.283                                        | -3.071                          | 0.212        | 3.283  | 3.359                           | 0.076        |
| <b>Fe4</b>             | 3.243                                         | 3.316                           | 0.073        | -3.242 | -2.983                          | 0.259        |
| <b>Sum</b>             | 0.035                                         | 0.534                           | 0.498        | -0.036 | 0.482                           | 0.517        |
| <b>S1</b>              | -0.102                                        | -0.046                          | 0.056        | 0.101  | 0.206                           | 0.104        |
| <b>S2</b>              | 0.048                                         | 0.188                           | 0.140        | -0.048 | 0.056                           | 0.103        |
| <b>S3</b>              | 0.060                                         | 0.213                           | 0.153        | -0.059 | 0.007                           | 0.066        |
| <b>S4</b>              | -0.057                                        | 0.005                           | 0.062        | 0.057  | 0.202                           | 0.145        |
| <b>Sum</b>             | -0.051                                        | 0.359                           | 0.411        | 0.052  | 0.471                           | 0.419        |
| <b>C12</b>             | -0.190                                        | -0.094                          | 0.096        | 0.189  | 0.134                           | -0.055       |
| <b>C96</b>             | 0.157                                         | 0.109                           | -0.049       | -0.156 | -0.063                          | 0.093        |
| <b>C197</b>            | -0.154                                        | -0.073                          | 0.081        | 0.154  | 0.102                           | -0.051       |
| <b>Sum</b>             | -0.186                                        | -0.058                          | 0.128        | 0.187  | 0.173                           | -0.013       |
| <b>Cluster</b>         | -0.202                                        | 0.835                           | 1.037        | 0.202  | 1.125                           | 0.923        |
| <b>O<sub>C4</sub></b>  | 0.182                                         | 0.143                           | -0.039       | -0.182 | -0.121                          | 0.061        |
| <b>C<sub>3</sub></b>   | 0.010                                         | 0.008                           | -0.002       | -0.011 | -0.006                          | 0.004        |
| <b>C<sub>2</sub></b>   | -0.005                                        | -0.004                          | 0.001        | 0.005  | 0.004                           | -0.001       |
| <b>HMBPP</b>           | 0.202                                         | 0.159                           | -0.043       | -0.202 | -0.132                          | 0.070        |
| <b>Cluster + HMBPP</b> | -0.001                                        | 0.993                           | 0.994        | 0.001  | 0.993                           | 0.993        |

|                        | $RO^{-}P^{H}E^{H}$  |        |              |                    |        |              |
|------------------------|---------------------|--------|--------------|--------------------|--------|--------------|
|                        | $\alpha\beta\alpha$ |        |              | $\beta\alpha\beta$ |        |              |
|                        | OX                  | RED    | $\Delta NSP$ | OX                 | RED    | $\Delta NSP$ |
| <b>Fe1</b>             | 3.355               | 3.434  | 0.079        | -3.356             | -3.211 | 0.145        |
| <b>Fe2</b>             | -3.285              | -3.178 | 0.107        | 3.282              | 3.353  | 0.071        |
| <b>Fe3</b>             | -3.279              | -3.071 | 0.208        | 3.278              | 3.341  | 0.063        |
| <b>Fe4</b>             | 3.250               | 3.340  | 0.090        | -3.246             | -2.991 | 0.255        |
| <b>Sum</b>             | 0.041               | 0.525  | 0.484        | -0.042             | 0.493  | 0.535        |
| <b>S1</b>              | -0.097              | -0.014 | 0.083        | 0.098              | 0.227  | 0.129        |
| <b>S2</b>              | 0.053               | 0.197  | 0.144        | -0.050             | 0.036  | 0.086        |
| <b>S3</b>              | 0.064               | 0.196  | 0.132        | -0.063             | 0.001  | 0.064        |
| <b>S4</b>              | -0.062              | -0.013 | 0.048        | 0.060              | 0.182  | 0.122        |
| <b>Sum</b>             | -0.042              | 0.365  | 0.407        | 0.045              | 0.446  | 0.401        |
| <b>C12</b>             | -0.192              | -0.093 | 0.099        | 0.191              | 0.132  | -0.059       |
| <b>C96</b>             | 0.165               | 0.113  | -0.052       | -0.165             | -0.064 | 0.101        |
| <b>C197</b>            | -0.159              | -0.073 | 0.086        | 0.158              | 0.107  | -0.052       |
| <b>Sum</b>             | -0.186              | -0.053 | 0.133        | 0.185              | 0.175  | -0.009       |
| <b>Cluster</b>         | -0.187              | 0.838  | 1.025        | 0.188              | 1.113  | 0.926        |
| <b>O<sub>C4</sub></b>  | 0.168               | 0.135  | -0.033       | -0.169             | -0.109 | 0.060        |
| <b>C<sub>3</sub></b>   | 0.010               | 0.008  | -0.002       | -0.010             | -0.005 | 0.005        |
| <b>C<sub>2</sub></b>   | -0.004              | -0.004 | 0.001        | 0.004              | 0.003  | -0.002       |
| <b>HMBPP</b>           | 0.187               | 0.151  | -0.036       | -0.188             | -0.117 | 0.071        |
| <b>Cluster + HMBPP</b> | 0.000               | 0.988  | 0.988        | 0.000              | 0.996  | 0.996        |

|                        | $RO^H P^E^-$             |        |              |                          |        |              |
|------------------------|--------------------------|--------|--------------|--------------------------|--------|--------------|
|                        | $\alpha\beta\beta\alpha$ |        |              | $\beta\alpha\alpha\beta$ |        |              |
|                        | OX                       | RED    | $\Delta NSP$ | OX                       | RED    | $\Delta NSP$ |
| <b>Fe1</b>             | 3.267                    | 3.325  | 0.058        | -3.270                   | -3.027 | 0.243        |
| <b>Fe2</b>             | -3.180                   | -3.039 | 0.141        | 3.181                    | 3.286  | 0.105        |
| <b>Fe3</b>             | -3.202                   | -3.026 | 0.176        | 3.207                    | 3.321  | 0.114        |
| <b>Fe4</b>             | 3.207                    | 3.303  | 0.097        | -3.211                   | -3.081 | 0.131        |
| <b>Sum</b>             | 0.092                    | 0.563  | 0.472        | -0.092                   | 0.500  | 0.592        |
| <b>S1</b>              | -0.031                   | 0.011  | 0.042        | 0.029                    | 0.201  | 0.172        |
| <b>S2</b>              | 0.082                    | 0.221  | 0.139        | -0.082                   | -0.015 | 0.067        |
| <b>S3</b>              | 0.089                    | 0.237  | 0.148        | -0.088                   | -0.028 | 0.060        |
| <b>S4</b>              | -0.046                   | 0.004  | 0.050        | 0.047                    | 0.146  | 0.099        |
| <b>Sum</b>             | 0.094                    | 0.473  | 0.379        | -0.094                   | 0.304  | 0.398        |
| <b>C12</b>             | -0.221                   | -0.111 | 0.110        | 0.221                    | 0.159  | -0.063       |
| <b>C96</b>             | 0.191                    | 0.129  | -0.062       | -0.194                   | -0.084 | 0.110        |
| <b>C197</b>            | -0.186                   | -0.081 | 0.106        | 0.189                    | 0.131  | -0.058       |
| <b>Sum</b>             | -0.216                   | -0.063 | 0.153        | 0.216                    | 0.206  | -0.010       |
| <b>Cluster</b>         | -0.030                   | 0.974  | 1.004        | 0.030                    | 1.010  | 0.980        |
| <b>O<sub>C4</sub></b>  | 0.023                    | 0.015  | -0.009       | -0.023                   | -0.014 | 0.009        |
| <b>C<sub>3</sub></b>   | 0.003                    | 0.002  | -0.001       | -0.003                   | -0.001 | 0.001        |
| <b>C<sub>2</sub></b>   | 0.000                    | 0.000  | -0.001       | 0.000                    | 0.002  | 0.002        |
| <b>HMBPP</b>           | 0.029                    | 0.018  | -0.011       | -0.028                   | -0.013 | 0.016        |
| <b>Cluster + HMBPP</b> | -0.001                   | 0.992  | 0.993        | 0.001                    | 0.997  | 0.996        |

|                        | $RO^H P^- E^H$      |        |              |                    |        |              |
|------------------------|---------------------|--------|--------------|--------------------|--------|--------------|
|                        | $\alpha\beta\alpha$ |        |              | $\beta\alpha\beta$ |        |              |
|                        | OX                  | RED    | $\Delta NSP$ | OX                 | RED    | $\Delta NSP$ |
| <b>Fe1</b>             | 3.205               | 3.285  | 0.080        | -3.206             | -2.964 | 0.241        |
| <b>Fe2</b>             | -3.175              | -3.026 | 0.149        | 3.174              | 3.280  | 0.106        |
| <b>Fe3</b>             | -3.197              | -3.004 | 0.193        | 3.195              | 3.316  | 0.121        |
| <b>Fe4</b>             | 3.222               | 3.289  | 0.067        | -3.222             | -3.095 | 0.127        |
| <b>Sum</b>             | 0.055               | 0.544  | 0.489        | -0.059             | 0.537  | 0.596        |
| <b>S1</b>              | -0.013              | 0.010  | 0.022        | 0.014              | 0.189  | 0.175        |
| <b>S2</b>              | 0.086               | 0.226  | 0.140        | -0.085             | -0.023 | 0.062        |
| <b>S3</b>              | 0.101               | 0.250  | 0.149        | -0.101             | -0.039 | 0.062        |
| <b>S4</b>              | -0.037              | 0.021  | 0.058        | 0.038              | 0.138  | 0.100        |
| <b>Sum</b>             | 0.137               | 0.507  | 0.370        | -0.133             | 0.267  | 0.400        |
| <b>C12</b>             | -0.233              | -0.116 | 0.117        | 0.233              | 0.165  | -0.069       |
| <b>C96</b>             | 0.207               | 0.141  | -0.066       | -0.207             | -0.091 | 0.116        |
| <b>C197</b>            | -0.185              | -0.095 | 0.090        | 0.185              | 0.130  | -0.055       |
| <b>Sum</b>             | -0.211              | -0.070 | 0.141        | 0.212              | 0.203  | -0.009       |
| <b>Cluster</b>         | -0.019              | 0.981  | 1.001        | 0.019              | 1.006  | 0.987        |
| <b>O<sub>C4</sub></b>  | 0.013               | 0.008  | -0.004       | -0.013             | -0.006 | 0.006        |
| <b>C<sub>3</sub></b>   | 0.002               | 0.001  | -0.002       | -0.002             | 0.000  | 0.002        |
| <b>C<sub>2</sub></b>   | 0.000               | 0.001  | 0.001        | 0.000              | 0.001  | 0.002        |
| <b>HMBPP</b>           | 0.019               | 0.013  | -0.006       | -0.019             | -0.008 | 0.012        |
| <b>Cluster + HMBPP</b> | -0.001              | 0.994  | 0.995        | 0.000              | 0.998  | 0.998        |

|                        | $RO^H P^H E^H$           |        |              |                          |        |              |
|------------------------|--------------------------|--------|--------------|--------------------------|--------|--------------|
|                        | $\alpha\beta\beta\alpha$ |        |              | $\beta\alpha\alpha\beta$ |        |              |
|                        | OX                       | RED    | $\Delta NSP$ | OX                       | RED    | $\Delta NSP$ |
| <b>Fe1</b>             | 3.208                    | 3.262  | 0.054        | -3.207                   | -2.963 | 0.244        |
| <b>Fe2</b>             | -3.181                   | -3.069 | 0.111        | 3.181                    | 3.286  | 0.106        |
| <b>Fe3</b>             | -3.193                   | -2.970 | 0.223        | 3.193                    | 3.317  | 0.124        |
| <b>Fe4</b>             | 3.223                    | 3.318  | 0.095        | -3.223                   | -3.099 | 0.124        |
| <b>Sum</b>             | 0.056                    | 0.540  | 0.483        | -0.056                   | 0.541  | 0.597        |
| <b>S1</b>              | -0.015                   | 0.032  | 0.047        | 0.015                    | 0.188  | 0.173        |
| <b>S2</b>              | 0.090                    | 0.219  | 0.129        | -0.090                   | -0.023 | 0.067        |
| <b>S3</b>              | 0.102                    | 0.243  | 0.141        | -0.102                   | -0.040 | 0.062        |
| <b>S4</b>              | -0.040                   | 0.011  | 0.052        | 0.040                    | 0.135  | 0.094        |
| <b>Sum</b>             | 0.137                    | 0.504  | 0.368        | -0.136                   | 0.260  | 0.397        |
| <b>C12</b>             | -0.235                   | -0.118 | 0.117        | 0.235                    | 0.166  | -0.069       |
| <b>C96</b>             | 0.213                    | 0.141  | -0.072       | -0.212                   | -0.095 | 0.117        |
| <b>C197</b>            | -0.188                   | -0.088 | 0.100        | 0.188                    | 0.132  | -0.056       |
| <b>Sum</b>             | -0.210                   | -0.065 | 0.146        | 0.210                    | 0.203  | -0.008       |
| <b>Cluster</b>         | -0.017                   | 0.979  | 0.996        | 0.018                    | 1.004  | 0.987        |
| <b>O<sub>C4</sub></b>  | 0.012                    | 0.008  | -0.003       | -0.012                   | -0.006 | 0.006        |
| <b>C<sub>3</sub></b>   | 0.003                    | 0.001  | -0.002       | -0.003                   | -0.001 | 0.002        |
| <b>C<sub>2</sub></b>   | 0.001                    | 0.001  | 0.000        | -0.001                   | 0.002  | 0.003        |
| <b>HMBPP</b>           | 0.017                    | 0.012  | -0.006       | -0.017                   | -0.004 | 0.013        |
| <b>Cluster + HMBPP</b> | 0.000                    | 0.991  | 0.991        | 0.001                    | 1.000  | 0.999        |

**Table S3.** Electrostatic potential (ESP) charge distributions computed for the lowest-energy,  $1e^-$  reduced RO(H)-bound valence isomers not included in Table 4 in the text.

|                        | RO <sup>-</sup> P <sup>-</sup> E <sup>H</sup> |                                 |            |        |                                 |            |
|------------------------|-----------------------------------------------|---------------------------------|------------|--------|---------------------------------|------------|
|                        | OX                                            | $\alpha\beta\beta\alpha$<br>RED | $\Delta q$ | OX     | $\beta\alpha\alpha\beta$<br>RED | $\Delta q$ |
| <b>Fe1</b>             | 0.584                                         | 0.628                           | 0.044      | 0.584  | 0.614                           | 0.030      |
| <b>Fe2</b>             | 0.532                                         | 0.590                           | 0.058      | 0.532  | 0.612                           | 0.080      |
| <b>Fe3</b>             | 0.632                                         | 0.656                           | 0.024      | 0.633  | 0.717                           | 0.084      |
| <b>Fe4</b>             | 0.505                                         | 0.556                           | 0.051      | 0.504  | 0.535                           | 0.031      |
| <b>Sum</b>             | 2.253                                         | 2.430                           | 0.177      | 2.253  | 2.478                           | 0.225      |
| <b>S1</b>              | -0.554                                        | -0.692                          | -0.138     | -0.554 | -0.720                          | -0.166     |
| <b>S2</b>              | -0.301                                        | -0.383                          | -0.082     | -0.300 | -0.395                          | -0.095     |
| <b>S3</b>              | -0.452                                        | -0.601                          | -0.149     | -0.451 | -0.594                          | -0.142     |
| <b>S4</b>              | -0.708                                        | -0.903                          | -0.195     | -0.709 | -0.933                          | -0.224     |
| <b>Sum</b>             | -2.015                                        | -2.578                          | -0.563     | -2.014 | -2.641                          | -0.627     |
| <b>C12</b>             | -0.351                                        | -0.490                          | -0.139     | -0.351 | -0.462                          | -0.111     |
| <b>C96</b>             | -0.424                                        | -0.549                          | -0.125     | -0.423 | -0.566                          | -0.142     |
| <b>C197</b>            | -0.470                                        | -0.597                          | -0.128     | -0.469 | -0.586                          | -0.116     |
| <b>Sum</b>             | -1.245                                        | -1.636                          | -0.392     | -1.244 | -1.613                          | -0.369     |
| <b>Total cluster</b>   | -1.006                                        | -1.784                          | -0.778     | -1.006 | -1.776                          | -0.771     |
| <b>O<sub>C4</sub></b>  | -0.509                                        | -0.561                          | -0.052     | -0.509 | -0.566                          | -0.057     |
| <b>C3</b>              | 0.060                                         | 0.067                           | 0.007      | 0.059  | 0.070                           | 0.011      |
| <b>C2</b>              | -0.228                                        | -0.236                          | -0.008     | -0.228 | -0.226                          | 0.002      |
| <b>Total HMBPP</b>     | -1.110                                        | -1.203                          | -0.093     | -1.110 | -1.200                          | -0.090     |
| <b>Cluster + HMBPP</b> | -2.116                                        | -2.988                          | -0.872     | -2.116 | -2.976                          | -0.860     |



|                        | RO <sup>-</sup> P <sup>H</sup> E <sup>H</sup> |        |        |        |        |        |
|------------------------|-----------------------------------------------|--------|--------|--------|--------|--------|
|                        | αββα                                          |        |        | βααβ   |        |        |
|                        | OX                                            | RED    | Δq     | OX     | RED    | Δq     |
| <b>Fe1</b>             | 0.549                                         | 0.574  | 0.025  | 0.551  | 0.573  | 0.023  |
| <b>Fe2</b>             | 0.543                                         | 0.612  | 0.069  | 0.541  | 0.618  | 0.077  |
| <b>Fe3</b>             | 0.610                                         | 0.632  | 0.022  | 0.607  | 0.678  | 0.071  |
| <b>Fe4</b>             | 0.499                                         | 0.524  | 0.025  | 0.497  | 0.522  | 0.025  |
| <b>Sum</b>             | 2.201                                         | 2.342  | 0.141  | 2.196  | 2.392  | 0.196  |
| <b>S1</b>              | -0.562                                        | -0.678 | -0.116 | -0.562 | -0.730 | -0.168 |
| <b>S2</b>              | -0.290                                        | -0.360 | -0.070 | -0.289 | -0.364 | -0.075 |
| <b>S3</b>              | -0.427                                        | -0.538 | -0.111 | -0.426 | -0.554 | -0.128 |
| <b>S4</b>              | -0.689                                        | -0.859 | -0.170 | -0.687 | -0.896 | -0.209 |
| <b>Sum</b>             | -1.968                                        | -2.435 | -0.467 | -1.964 | -2.544 | -0.580 |
| <b>C12</b>             | -0.357                                        | -0.484 | -0.127 | -0.357 | -0.470 | -0.113 |
| <b>C96</b>             | -0.404                                        | -0.592 | -0.188 | -0.404 | -0.561 | -0.157 |
| <b>C197</b>            | -0.445                                        | -0.586 | -0.141 | -0.442 | -0.549 | -0.107 |
| <b>Sum</b>             | -1.206                                        | -1.662 | -0.455 | -1.203 | -1.580 | -0.377 |
| <b>Total cluster</b>   | -0.974                                        | -1.755 | -0.781 | -0.970 | -1.732 | -0.762 |
| <b>O<sub>C4</sub></b>  | -0.497                                        | -0.540 | -0.043 | -0.499 | -0.556 | -0.057 |
| <b>C3</b>              | 0.084                                         | 0.099  | 0.016  | 0.085  | 0.093  | 0.008  |
| <b>C2</b>              | -0.272                                        | -0.273 | -0.002 | -0.272 | -0.274 | -0.003 |
| <b>Total HMBPP</b>     | -0.800                                        | -0.877 | -0.077 | -0.800 | -0.905 | -0.104 |
| <b>Cluster + HMBPP</b> | -1.773                                        | -2.632 | -0.859 | -1.771 | -2.637 | -0.866 |

|                        | $RO^H P^- E^-$      |        |            |                    |        |            |
|------------------------|---------------------|--------|------------|--------------------|--------|------------|
|                        | $\alpha\beta\alpha$ |        |            | $\beta\alpha\beta$ |        |            |
|                        | OX                  | RED    | $\Delta q$ | OX                 | RED    | $\Delta q$ |
| <b>Fe1</b>             | 0.538               | 0.558  | 0.019      | 0.520              | 0.529  | 0.009      |
| <b>Fe2</b>             | 0.470               | 0.531  | 0.061      | 0.457              | 0.550  | 0.093      |
| <b>Fe3</b>             | 0.588               | 0.668  | 0.080      | 0.601              | 0.711  | 0.111      |
| <b>Fe4</b>             | 0.458               | 0.514  | 0.056      | 0.444              | 0.490  | 0.046      |
| <b>Sum</b>             | 2.054               | 2.270  | 0.216      | 2.021              | 2.280  | 0.259      |
| <b>S1</b>              | -0.481              | -0.611 | -0.129     | -0.475             | -0.652 | -0.177     |
| <b>S2</b>              | -0.301              | -0.366 | -0.065     | -0.265             | -0.338 | -0.074     |
| <b>S3</b>              | -0.381              | -0.539 | -0.159     | -0.374             | -0.524 | -0.149     |
| <b>S4</b>              | -0.627              | -0.832 | -0.205     | -0.629             | -0.848 | -0.219     |
| <b>Sum</b>             | -1.790              | -2.348 | -0.558     | -1.743             | -2.361 | -0.619     |
| <b>C12</b>             | -0.257              | -0.408 | -0.152     | -0.255             | -0.380 | -0.125     |
| <b>C96</b>             | -0.346              | -0.493 | -0.147     | -0.353             | -0.511 | -0.159     |
| <b>C197</b>            | -0.420              | -0.593 | -0.173     | -0.430             | -0.589 | -0.158     |
| <b>Sum</b>             | -1.023              | -1.494 | -0.471     | -1.038             | -1.480 | -0.442     |
| <b>Total cluster</b>   | -0.759              | -1.571 | -0.812     | -0.759             | -1.561 | -0.802     |
| <b>O<sub>C4</sub></b>  | -0.402              | -0.424 | -0.021     | -0.406             | -0.437 | -0.031     |
| <b>C3</b>              | 0.023               | 0.029  | 0.005      | 0.015              | 0.017  | 0.002      |
| <b>C2</b>              | -0.166              | -0.194 | -0.028     | -0.190             | -0.219 | -0.030     |
| <b>Total HMBPP</b>     | -0.682              | -0.728 | -0.046     | -0.707             | -0.866 | -0.159     |
| <b>Cluster + HMBPP</b> | -1.441              | -2.299 | -0.859     | -1.466             | -2.427 | -0.961     |

|                        | $RO^H P^- E^H$      |        |            |                    |        |            |
|------------------------|---------------------|--------|------------|--------------------|--------|------------|
|                        | $\alpha\beta\alpha$ |        |            | $\beta\alpha\beta$ |        |            |
|                        | OX                  | RED    | $\Delta q$ | OX                 | RED    | $\Delta q$ |
| <b>Fe1</b>             | 0.404               | 0.427  | 0.024      | 0.404              | 0.402  | -0.001     |
| <b>Fe2</b>             | 0.490               | 0.558  | 0.068      | 0.491              | 0.569  | 0.078      |
| <b>Fe3</b>             | 0.599               | 0.641  | 0.042      | 0.599              | 0.686  | 0.087      |
| <b>Fe4</b>             | 0.477               | 0.527  | 0.050      | 0.477              | 0.519  | 0.042      |
| <b>Sum</b>             | 1.969               | 2.153  | 0.184      | 1.970              | 2.176  | 0.206      |
| <b>S1</b>              | -0.440              | -0.586 | -0.146     | -0.440             | -0.621 | -0.181     |
| <b>S2</b>              | -0.302              | -0.375 | -0.073     | -0.302             | -0.369 | -0.067     |
| <b>S3</b>              | -0.412              | -0.550 | -0.138     | -0.412             | -0.546 | -0.135     |
| <b>S4</b>              | -0.600              | -0.788 | -0.188     | -0.600             | -0.804 | -0.204     |
| <b>Sum</b>             | -1.753              | -2.298 | -0.545     | -1.754             | -2.340 | -0.586     |
| <b>C12</b>             | -0.267              | -0.414 | -0.147     | -0.268             | -0.391 | -0.124     |
| <b>C96</b>             | -0.332              | -0.466 | -0.133     | -0.332             | -0.486 | -0.153     |
| <b>C197</b>            | -0.393              | -0.552 | -0.159     | -0.393             | -0.529 | -0.136     |
| <b>Sum</b>             | -0.993              | -1.432 | -0.439     | -0.993             | -1.406 | -0.413     |
| <b>Total cluster</b>   | -0.777              | -1.577 | -0.801     | -0.777             | -1.571 | -0.794     |
| <b>O<sub>C4</sub></b>  | -0.119              | -0.122 | -0.003     | -0.119             | -0.133 | -0.014     |
| <b>C3</b>              | -0.036              | -0.033 | 0.002      | -0.035             | -0.043 | -0.008     |
| <b>C2</b>              | -0.142              | -0.162 | -0.020     | -0.142             | -0.151 | -0.009     |
| <b>Total HMBPP</b>     | -0.430              | -0.488 | -0.058     | -0.430             | -0.486 | -0.055     |
| <b>Cluster + HMBPP</b> | -1.207              | -2.065 | -0.858     | -1.207             | -2.056 | -0.849     |

|                        | RO <sup>H</sup> P <sup>H</sup> E <sup>H</sup> |        |        |        |        |        |
|------------------------|-----------------------------------------------|--------|--------|--------|--------|--------|
|                        | αββα                                          |        |        | βααβ   |        |        |
|                        | OX                                            | RED    | Δq     | OX     | RED    | Δq     |
| <b>Fe1</b>             | 0.395                                         | 0.420  | 0.025  | 0.394  | 0.401  | 0.006  |
| <b>Fe2</b>             | 0.505                                         | 0.569  | 0.064  | 0.505  | 0.587  | 0.082  |
| <b>Fe3</b>             | 0.582                                         | 0.633  | 0.051  | 0.582  | 0.661  | 0.079  |
| <b>Fe4</b>             | 0.468                                         | 0.520  | 0.052  | 0.468  | 0.508  | 0.039  |
| <b>Sum</b>             | 1.949                                         | 2.142  | 0.193  | 1.949  | 2.157  | 0.207  |
| <b>S1</b>              | -0.452                                        | -0.605 | -0.153 | -0.452 | -0.639 | -0.187 |
| <b>S2</b>              | -0.299                                        | -0.372 | -0.072 | -0.299 | -0.368 | -0.069 |
| <b>S3</b>              | -0.395                                        | -0.541 | -0.146 | -0.394 | -0.530 | -0.136 |
| <b>S4</b>              | -0.578                                        | -0.766 | -0.188 | -0.579 | -0.782 | -0.203 |
| <b>Sum</b>             | -1.724                                        | -2.284 | -0.560 | -1.725 | -2.319 | -0.594 |
| <b>C12</b>             | -0.275                                        | -0.422 | -0.147 | -0.275 | -0.401 | -0.126 |
| <b>C96</b>             | -0.318                                        | -0.454 | -0.137 | -0.317 | -0.469 | -0.152 |
| <b>C197</b>            | -0.370                                        | -0.527 | -0.158 | -0.370 | -0.497 | -0.127 |
| <b>Sum</b>             | -0.962                                        | -1.404 | -0.441 | -0.963 | -1.367 | -0.405 |
| <b>Total cluster</b>   | -0.737                                        | -1.546 | -0.808 | -0.738 | -1.529 | -0.792 |
| <b>O<sub>C4</sub></b>  | -0.159                                        | -0.154 | 0.006  | -0.159 | -0.173 | -0.014 |
| <b>C3</b>              | 0.000                                         | 0.002  | 0.001  | 0.001  | -0.007 | -0.007 |
| <b>C2</b>              | -0.187                                        | -0.207 | -0.021 | -0.187 | -0.196 | -0.009 |
| <b>Total HMBPP</b>     | -0.121                                        | -0.165 | -0.043 | -0.121 | -0.180 | -0.059 |
| <b>Cluster + HMBPP</b> | -0.859                                        | -1.710 | -0.852 | -0.859 | -1.710 | -0.850 |

**Table S4.** Relative energies (kcal mol<sup>-1</sup>) of all valence isomers considered for 1e<sup>-</sup> reduced RO(H)-bound states.

|                                                                  | Relative energies |            |
|------------------------------------------------------------------|-------------------|------------|
|                                                                  | DFT/COSMO         | DFT/SCRF   |
| <b>RO<sup>-</sup>P<sup>-</sup>E<sup>H</sup> (RO<sup>-</sup>)</b> |                   |            |
| βαβα                                                             | 29.6              | 15.4       |
| βααβ                                                             | 30.2              | 13.7       |
| αββα                                                             | 29.8              | 13.0       |
| ααββ                                                             | 29.5              | 14.9       |
| <b>RO<sup>-</sup>P<sup>H</sup>E<sup>H</sup> (RO<sup>-</sup>)</b> |                   |            |
| βαβα                                                             | 19.2              | 14.1       |
| βααβ                                                             | 16.9              | 10.3       |
| αββα                                                             | 16.6              | 16.7       |
| ααββ                                                             | 19.6              | 12.9       |
| <b>RO<sup>H</sup>P<sup>-</sup>E<sup>-</sup> (ROH)</b>            |                   |            |
| βαβα                                                             | 17.6              | 8.4        |
| βααβ                                                             | 17.6              | 5.1        |
| αββα                                                             | 20.2              | 4.1        |
| ααββ                                                             | 29.9              | 11.6       |
| <b>RO<sup>H</sup>P<sup>H</sup>E<sup>-</sup> (ROH)</b>            |                   |            |
| βαβα                                                             | 6.7               | 5.9        |
| βααβ                                                             | 5.8               | <b>0.0</b> |
| αββα                                                             | 16.7              | 9.5        |
| ααββ                                                             | 16.3              | 10.1       |
| <b>RO<sup>H</sup>P<sup>-</sup>E<sup>H</sup> (ROH)</b>            |                   |            |
| βαβα                                                             | 6.7               | 2.1        |
| βααβ                                                             | 5.3               | 0.3        |
| αββα                                                             | 7.3               | 2.0        |
| ααββ                                                             | 10.2              | 4.2        |
| <b>RO<sup>H</sup>P<sup>H</sup>E<sup>H</sup> (ROH)</b>            |                   |            |
| βαβα                                                             | 0.9               | 5.9        |
| βααβ                                                             | <b>0.0</b>        | 4.5        |
| αββα                                                             | 2.2               | 5.8        |
| ααββ                                                             | 4.6               | 9.0        |

**Table S5.** Geometric parameters compared between ROH- and  $\eta^2$ -bound geometries in the  $1e^-$  reduced  $\text{RO}^{\text{H}}\text{P}^{\text{H}}\text{E}^{\text{H}}$  state. Bond lengths are shown in Å.

| Binding mode<br>Valence isomer                                  | ROH                      |                          | $\eta^2$ -ring           |                          | $\eta^2$ -trans          |                          |
|-----------------------------------------------------------------|--------------------------|--------------------------|--------------------------|--------------------------|--------------------------|--------------------------|
|                                                                 | $\alpha\alpha\beta\beta$ | $\beta\alpha\alpha\beta$ | $\alpha\alpha\beta\beta$ | $\beta\alpha\alpha\beta$ | $\alpha\alpha\beta\beta$ | $\beta\alpha\alpha\beta$ |
| <b>Cluster bond lengths:</b>                                    |                          |                          |                          |                          |                          |                          |
| Fe1 – S1                                                        | 2.292                    | 2.251                    | 2.315                    | 2.295                    | 2.305                    | 2.289                    |
| Fe1 – S2                                                        | 2.285                    | 2.268                    | 2.281                    | 2.280                    | 2.281                    | 2.294                    |
| Fe1 – S3                                                        | 2.227                    | 2.325                    | 2.230                    | 2.372                    | 2.229                    | 2.365                    |
| Fe2 – S1                                                        | 2.332                    | 2.343                    | 2.343                    | 2.323                    | 2.346                    | 2.326                    |
| Fe2 – S2                                                        | 2.294                    | 2.215                    | 2.303                    | 2.197                    | 2.305                    | 2.196                    |
| Fe2 – S4                                                        | 2.274                    | 2.391                    | 2.269                    | 2.368                    | 2.275                    | 2.364                    |
| Fe3 – S1                                                        | 2.251                    | 2.333                    | 2.259                    | 2.314                    | 2.256                    | 2.314                    |
| Fe3 – S3                                                        | 2.322                    | 2.255                    | 2.329                    | 2.266                    | 2.321                    | 2.262                    |
| Fe3 – S4                                                        | 2.357                    | 2.382                    | 2.359                    | 2.367                    | 2.361                    | 2.359                    |
| Fe4 – S2                                                        | 2.292                    | 2.326                    | 2.278                    | 2.311                    | 2.282                    | 2.315                    |
| Fe4 – S3                                                        | 2.323                    | 2.310                    | 2.334                    | 2.308                    | 2.339                    | 2.303                    |
| Fe4 – S4                                                        | 2.351                    | 2.296                    | 2.336                    | 2.249                    | 2.336                    | 2.249                    |
| Fe2 – S <sub>C13</sub>                                          | 2.332                    | 2.311                    | 2.319                    | 2.288                    | 2.312                    | 2.285                    |
| Fe3 – S <sub>C197</sub>                                         | 2.289                    | 2.324                    | 2.296                    | 2.357                    | 2.284                    | 2.339                    |
| Fe4 – S <sub>C96</sub>                                          | 2.306                    | 2.353                    | 2.292                    | 2.307                    | 2.291                    | 2.309                    |
| <b>HMBPP bond lengths:</b>                                      |                          |                          |                          |                          |                          |                          |
| Fe1 – O <sub>C4</sub>                                           | 2.376                    | 2.282                    | 4.531                    | 4.283                    | 3.746                    | 3.563                    |
| Fe1 – C <sub>3</sub>                                            | 3.318                    | 3.241                    | 2.526                    | 2.139                    | 2.672                    | 2.136                    |
| Fe1 – C <sub>2</sub>                                            | 3.482                    | 3.431                    | 2.468                    | 2.116                    | 2.538                    | 2.098                    |
| <b>H-bond lengths:</b>                                          |                          |                          |                          |                          |                          |                          |
| O <sub>C4</sub> – O <sub>T167</sub>                             | 3.173                    | 3.161                    | 4.333                    | 4.345                    | 3.384                    | 3.318                    |
| O <sub>T167</sub> – O <sub>E126</sub>                           | 2.658                    | 2.653                    | 2.724                    | 2.710                    | 2.667                    | 2.633                    |
| O <sub>E126</sub> – O <sub>W1</sub>                             | 3.773                    | 3.740                    | 3.799                    | 3.750                    | 3.731                    | 3.475                    |
| O <sub>W1</sub> – O <sub>PPi</sub>                              | 2.842                    | 2.841                    | 2.994                    | 3.005                    | 2.963                    | 3.012                    |
| O <sub>C4</sub> – O <sub>E126</sub>                             | 4.155                    | 4.155                    | 3.590                    | 3.644                    | 3.170                    | 3.134                    |
| O <sub>C4</sub> – O <sub>PPi</sub>                              | 4.850                    | 4.861                    | 2.783                    | 2.787                    | 4.502                    | 4.534                    |
| <b>HMBPP angle</b>                                              |                          |                          |                          |                          |                          |                          |
| C <sub>2</sub> –C <sub>3</sub> –C <sub>4</sub> –O <sub>C4</sub> | –98.8                    | –99.3                    | 101.2                    | 94.7                     | –150.6                   | –155.8                   |

**Table S6.** NSPs computed for the lowest-energy,  $1e^-$  reduced  $\eta^2$ -bound states omitted from Table 8 in the text.

|                        | $RO^H P^- E^H$           |                       |              |                          |                       |              |
|------------------------|--------------------------|-----------------------|--------------|--------------------------|-----------------------|--------------|
|                        | $\alpha\beta\beta\alpha$ |                       |              | $\beta\alpha\alpha\beta$ |                       |              |
|                        | Ox (ROH)                 | Red( $\eta^2$ -trans) | $\Delta$ NSP | Ox (ROH)                 | Red( $\eta^2$ -trans) | $\Delta$ NSP |
| <b>FE1</b>             | 3.205                    | 3.176                 | -0.030       | -3.206                   | -2.886                | 0.320        |
| <b>FE2</b>             | -3.175                   | -2.986                | 0.189        | 3.174                    | 3.219                 | 0.045        |
| <b>FE3</b>             | -3.197                   | -2.894                | 0.303        | 3.195                    | 3.322                 | 0.127        |
| <b>FE4</b>             | 3.222                    | 3.292                 | 0.070        | -3.222                   | -3.199                | 0.023        |
| <b>Sum</b>             | 0.055                    | 0.588                 | 0.533        | -0.059                   | 0.456                 | 0.515        |
| <b>S1</b>              | -0.013                   | 0.048                 | 0.061        | 0.014                    | 0.220                 | 0.206        |
| <b>S2</b>              | 0.086                    | 0.167                 | 0.082        | -0.085                   | -0.040                | 0.045        |
| <b>S3</b>              | 0.101                    | 0.215                 | 0.113        | -0.101                   | -0.019                | 0.082        |
| <b>S4</b>              | -0.037                   | 0.010                 | 0.048        | 0.038                    | 0.053                 | 0.015        |
| <b>Sum</b>             | 0.137                    | 0.440                 | 0.303        | -0.133                   | 0.215                 | 0.349        |
| <b>C12</b>             | -0.233                   | -0.115                | 0.118        | 0.233                    | 0.181                 | -0.053       |
| <b>C96</b>             | 0.207                    | 0.141                 | -0.066       | -0.207                   | -0.143                | 0.064        |
| <b>C197</b>            | -0.185                   | -0.088                | 0.097        | 0.185                    | 0.136                 | -0.049       |
| <b>Sum</b>             | -0.211                   | -0.062                | 0.149        | 0.212                    | 0.174                 | -0.038       |
| <b>Total cluster</b>   | -0.019                   | 0.966                 | 0.985        | 0.019                    | 0.845                 | 0.826        |
| <b>O<sub>c4</sub></b>  | 0.013                    | 0.000                 | -0.012       | -0.013                   | 0.000                 | 0.013        |
| <b>C<sub>3</sub></b>   | 0.002                    | 0.013                 | 0.011        | -0.002                   | 0.057                 | 0.059        |
| <b>C<sub>2</sub></b>   | 0.000                    | -0.001                | -0.001       | 0.000                    | 0.108                 | 0.108        |
| <b>Total HMBPP</b>     | 0.019                    | 0.020                 | 0.001        | -0.019                   | 0.155                 | 0.174        |
| <b>Cluster + HMBPP</b> | -0.001                   | 0.986                 | 0.986        | 0.000                    | 1.000                 | 1.000        |

|                        | RO <sup>H</sup> P <sup>H</sup> E <sup>H</sup> |                           |        |          |                           |        |
|------------------------|-----------------------------------------------|---------------------------|--------|----------|---------------------------|--------|
|                        | αββα                                          |                           |        | βααβ     |                           |        |
|                        | Ox (ROH)                                      | Red(η <sup>2</sup> -ring) | ΔNSP   | Ox (ROH) | Red(η <sup>2</sup> -ring) | ΔNSP   |
| <b>FE1</b>             | 3.208                                         | 3.180                     | -0.027 | -3.207   | -2.865                    | 0.342  |
| <b>FE2</b>             | -3.181                                        | -2.989                    | 0.192  | 3.181    | 3.200                     | 0.019  |
| <b>FE3</b>             | -3.193                                        | -2.922                    | 0.272  | 3.193    | 3.327                     | 0.134  |
| <b>FE4</b>             | 3.223                                         | 3.302                     | 0.079  | -3.223   | -3.197                    | 0.026  |
| <b>Sum</b>             | 0.056                                         | 0.572                     | 0.516  | -0.056   | 0.466                     | 0.522  |
| <b>S1</b>              | -0.015                                        | 0.039                     | 0.054  | 0.015    | 0.216                     | 0.201  |
| <b>S2</b>              | 0.090                                         | 0.179                     | 0.089  | -0.090   | -0.048                    | 0.042  |
| <b>S3</b>              | 0.102                                         | 0.219                     | 0.117  | -0.102   | -0.028                    | 0.074  |
| <b>S4</b>              | -0.040                                        | 0.017                     | 0.058  | 0.040    | 0.047                     | 0.006  |
| <b>Sum</b>             | 0.137                                         | 0.454                     | 0.317  | -0.136   | 0.187                     | 0.324  |
| <b>C12</b>             | -0.235                                        | -0.109                    | 0.126  | 0.235    | 0.190                     | -0.045 |
| <b>C96</b>             | 0.213                                         | 0.153                     | -0.060 | -0.212   | -0.156                    | 0.056  |
| <b>C197</b>            | -0.188                                        | -0.100                    | 0.088  | 0.188    | 0.143                     | -0.045 |
| <b>Sum</b>             | -0.210                                        | -0.056                    | 0.154  | 0.210    | 0.176                     | -0.034 |
| <b>Total cluster</b>   | -0.017                                        | 0.970                     | 0.987  | 0.018    | 0.830                     | 0.812  |
| <b>O<sub>c4</sub></b>  | 0.012                                         | 0.005                     | -0.007 | -0.012   | 0.002                     | 0.014  |
| <b>C<sub>3</sub></b>   | 0.003                                         | 0.010                     | 0.007  | -0.003   | 0.063                     | 0.066  |
| <b>C<sub>2</sub></b>   | 0.001                                         | 0.001                     | 0.000  | -0.001   | 0.115                     | 0.116  |
| <b>Total HMBPP</b>     | 0.017                                         | 0.018                     | 0.001  | -0.017   | 0.169                     | 0.186  |
| <b>Cluster + HMBPP</b> | 0.000                                         | 0.988                     | 0.988  | 0.001    | 0.998                     | 0.997  |



|                        | RO <sup>H</sup> P <sup>H</sup> E <sup>H</sup> |                            |        |          |                            |        |
|------------------------|-----------------------------------------------|----------------------------|--------|----------|----------------------------|--------|
|                        | αββα                                          |                            |        | βααβ     |                            |        |
|                        | Ox (ROH)                                      | Red(η <sup>2</sup> -trans) | ΔNSP   | Ox (ROH) | Red(η <sup>2</sup> -trans) | ΔNSP   |
| <b>FE1</b>             | 3.208                                         | 2.952                      | -0.255 | -3.207   | -2.882                     | 0.325  |
| <b>FE2</b>             | -3.181                                        | -2.364                     | 0.817  | 3.181    | 3.222                      | 0.041  |
| <b>FE3</b>             | -3.193                                        | -2.928                     | 0.266  | 3.193    | 3.329                      | 0.136  |
| <b>FE4</b>             | 3.223                                         | 3.236                      | 0.014  | -3.223   | -3.216                     | 0.007  |
| <b>Sum</b>             | 0.056                                         | 0.898                      | 0.841  | -0.056   | 0.453                      | 0.509  |
| <b>S1</b>              | -0.015                                        | -0.037                     | -0.022 | 0.015    | 0.215                      | 0.200  |
| <b>S2</b>              | 0.090                                         | 0.159                      | 0.069  | -0.090   | -0.046                     | 0.044  |
| <b>S3</b>              | 0.102                                         | 0.109                      | 0.007  | -0.102   | -0.029                     | 0.073  |
| <b>S4</b>              | -0.040                                        | 0.024                      | 0.064  | 0.040    | 0.055                      | 0.014  |
| <b>Sum</b>             | 0.137                                         | 0.255                      | 0.118  | -0.136   | 0.194                      | 0.330  |
| <b>C12</b>             | -0.235                                        | -0.034                     | 0.202  | 0.235    | 0.187                      | -0.048 |
| <b>C96</b>             | 0.213                                         | 0.136                      | -0.076 | -0.212   | -0.152                     | 0.061  |
| <b>C197</b>            | -0.188                                        | -0.104                     | 0.084  | 0.188    | 0.143                      | -0.045 |
| <b>Sum</b>             | -0.210                                        | -0.001                     | 0.209  | 0.210    | 0.177                      | -0.033 |
| <b>Total cluster</b>   | -0.017                                        | 1.151                      | 1.169  | 0.018    | 0.824                      | 0.807  |
| <b>O<sub>c4</sub></b>  | 0.012                                         | 0.000                      | -0.011 | -0.012   | 0.000                      | 0.012  |
| <b>C<sub>3</sub></b>   | 0.003                                         | -0.072                     | -0.076 | -0.003   | 0.068                      | 0.071  |
| <b>C<sub>2</sub></b>   | 0.001                                         | -0.087                     | -0.088 | -0.001   | 0.113                      | 0.114  |
| <b>Total HMBPP</b>     | 0.017                                         | -0.154                     | -0.171 | -0.017   | 0.174                      | 0.191  |
| <b>Cluster + HMBPP</b> | 0.000                                         | 0.998                      | 0.998  | 0.001    | 0.999                      | 0.998  |

**Table S7.** ESP charge distributions computed for the lowest-energy,  $1e^-$  reduced  $\eta^2$ -bound states omitted from Table 9 in the text.

|                        | $RO^H P^- E^H$      |                       |            |                    |                       |            |
|------------------------|---------------------|-----------------------|------------|--------------------|-----------------------|------------|
|                        | $\alpha\beta\alpha$ |                       |            | $\beta\alpha\beta$ |                       |            |
|                        | Ox                  | Red( $\eta^2$ -trans) | $\Delta q$ | Ox                 | Red( $\eta^2$ -trans) | $\Delta q$ |
| <b>FE1</b>             | 0.404               | 0.503                 | 0.100      | 0.404              | 0.443                 | 0.039      |
| <b>FE2</b>             | 0.490               | 0.527                 | 0.037      | 0.491              | 0.514                 | 0.023      |
| <b>FE3</b>             | 0.599               | 0.626                 | 0.027      | 0.599              | 0.664                 | 0.065      |
| <b>FE4</b>             | 0.477               | 0.517                 | 0.040      | 0.477              | 0.502                 | 0.025      |
| <b>Sum</b>             | 1.969               | 2.173                 | 0.204      | 1.970              | 2.122                 | 0.152      |
| <b>S1</b>              | -0.440              | -0.596                | -0.156     | -0.440             | -0.595                | -0.155     |
| <b>S2</b>              | -0.302              | -0.357                | -0.055     | -0.302             | -0.299                | 0.003      |
| <b>S3</b>              | -0.412              | -0.615                | -0.203     | -0.412             | -0.580                | -0.168     |
| <b>S4</b>              | -0.600              | -0.734                | -0.134     | -0.600             | -0.691                | -0.091     |
| <b>Sum</b>             | -1.753              | -2.301                | -0.548     | -1.754             | -2.165                | -0.411     |
| <b>C12</b>             | -0.267              | -0.413                | -0.146     | -0.268             | -0.373                | -0.105     |
| <b>C96</b>             | -0.332              | -0.439                | -0.106     | -0.332             | -0.399                | -0.067     |
| <b>C197</b>            | -0.393              | -0.481                | -0.088     | -0.393             | -0.445                | -0.053     |
| <b>Sum</b>             | -0.993              | -1.333                | -0.340     | -0.993             | -1.217                | -0.225     |
| <b>Total cluster</b>   | -0.777              | -1.461                | -0.685     | -0.777             | -1.260                | -0.484     |
| <b>O<sub>C4</sub></b>  | -0.119              | -0.472                | -0.353     | -0.119             | -0.491                | -0.372     |
| <b>C<sub>3</sub></b>   | -0.036              | 0.029                 | 0.065      | -0.035             | 0.006                 | 0.042      |
| <b>C<sub>2</sub></b>   | -0.142              | -0.103                | 0.039      | -0.142             | -0.108                | 0.034      |
| <b>Total HMBPP</b>     | -0.430              | -0.724                | -0.293     | -0.430             | -0.916                | -0.486     |
| <b>Cluster + HMBPP</b> | -1.207              | -2.185                | -0.978     | -1.207             | -2.177                | -0.970     |

|                        | RO <sup>H</sup> P <sup>H</sup> E <sup>H</sup> |                           |        |        |                           |        |
|------------------------|-----------------------------------------------|---------------------------|--------|--------|---------------------------|--------|
|                        | αβα                                           |                           |        | βααβ   |                           |        |
|                        | Ox                                            | Red(η <sup>2</sup> -ring) | Δq     | Ox     | Red(η <sup>2</sup> -ring) | Δq     |
| <b>FE1</b>             | 0.395                                         | 0.360                     | -0.035 | 0.394  | 0.292                     | -0.103 |
| <b>FE2</b>             | 0.505                                         | 0.554                     | 0.049  | 0.505  | 0.538                     | 0.033  |
| <b>FE3</b>             | 0.582                                         | 0.620                     | 0.038  | 0.582  | 0.661                     | 0.079  |
| <b>FE4</b>             | 0.468                                         | 0.539                     | 0.071  | 0.468  | 0.509                     | 0.041  |
| <b>Sum</b>             | 1.949                                         | 2.073                     | 0.124  | 1.949  | 1.999                     | 0.050  |
| <b>S1</b>              | -0.452                                        | -0.572                    | -0.120 | -0.452 | -0.578                    | -0.126 |
| <b>S2</b>              | -0.299                                        | -0.322                    | -0.023 | -0.299 | -0.264                    | 0.035  |
| <b>S3</b>              | -0.395                                        | -0.601                    | -0.206 | -0.394 | -0.565                    | -0.171 |
| <b>S4</b>              | -0.578                                        | -0.730                    | -0.152 | -0.579 | -0.673                    | -0.094 |
| <b>Sum</b>             | -1.724                                        | -2.224                    | -0.500 | -1.725 | -2.080                    | -0.355 |
| <b>C12</b>             | -0.275                                        | -0.426                    | -0.151 | -0.275 | -0.371                    | -0.096 |
| <b>C96</b>             | -0.318                                        | -0.425                    | -0.107 | -0.317 | -0.386                    | -0.069 |
| <b>C197</b>            | -0.370                                        | -0.475                    | -0.106 | -0.370 | -0.446                    | -0.076 |
| <b>Sum</b>             | -0.962                                        | -1.326                    | -0.364 | -0.963 | -1.204                    | -0.241 |
| <b>Total cluster</b>   | -0.737                                        | -1.477                    | -0.740 | -0.738 | -1.284                    | -0.547 |
| <b>O<sub>C4</sub></b>  | -0.159                                        | -0.328                    | -0.169 | -0.159 | -0.349                    | -0.189 |
| <b>C<sub>3</sub></b>   | 0.000                                         | 0.052                     | 0.051  | 0.001  | 0.021                     | 0.020  |
| <b>C<sub>2</sub></b>   | -0.187                                        | -0.125                    | 0.061  | -0.187 | -0.113                    | 0.074  |
| <b>Total HMBPP</b>     | -0.121                                        | -0.286                    | -0.165 | -0.121 | -0.435                    | -0.313 |
| <b>Cluster + HMBPP</b> | -0.859                                        | -1.764                    | -0.905 | -0.859 | -1.719                    | -0.860 |

|                        | RO <sup>H</sup> P <sup>H</sup> E <sup>H</sup> |                            |        |        |                            |        |
|------------------------|-----------------------------------------------|----------------------------|--------|--------|----------------------------|--------|
|                        | αββα                                          |                            |        | βααβ   |                            |        |
|                        | Ox                                            | Red(η <sup>2</sup> -trans) | Δq     | Ox     | Red(η <sup>2</sup> -trans) | Δq     |
| <b>FE1</b>             | 0.395                                         | 0.430                      | 0.035  | 0.394  | 0.410                      | 0.016  |
| <b>FE2</b>             | 0.505                                         | 0.500                      | -0.004 | 0.505  | 0.511                      | 0.006  |
| <b>FE3</b>             | 0.582                                         | 0.612                      | 0.030  | 0.582  | 0.626                      | 0.044  |
| <b>FE4</b>             | 0.468                                         | 0.513                      | 0.045  | 0.468  | 0.491                      | 0.023  |
| <b>Sum</b>             | 1.949                                         | 2.055                      | 0.105  | 1.949  | 2.038                      | 0.089  |
| <b>S1</b>              | -0.452                                        | -0.548                     | -0.096 | -0.452 | -0.586                     | -0.134 |
| <b>S2</b>              | -0.299                                        | -0.326                     | -0.026 | -0.299 | -0.295                     | 0.005  |
| <b>S3</b>              | -0.395                                        | -0.576                     | -0.182 | -0.394 | -0.550                     | -0.156 |
| <b>S4</b>              | -0.578                                        | -0.661                     | -0.082 | -0.579 | -0.651                     | -0.071 |
| <b>Sum</b>             | -1.724                                        | -2.111                     | -0.386 | -1.725 | -2.082                     | -0.357 |
| <b>C12</b>             | -0.275                                        | -0.409                     | -0.134 | -0.275 | -0.372                     | -0.097 |
| <b>C96</b>             | -0.318                                        | -0.411                     | -0.093 | -0.317 | -0.377                     | -0.060 |
| <b>C197</b>            | -0.370                                        | -0.466                     | -0.096 | -0.370 | -0.421                     | -0.051 |
| <b>Sum</b>             | -0.962                                        | -1.285                     | -0.323 | -0.963 | -1.171                     | -0.208 |
| <b>Total cluster</b>   | -0.737                                        | -1.341                     | -0.604 | -0.738 | -1.215                     | -0.477 |
| <b>O<sub>C4</sub></b>  | -0.159                                        | -0.488                     | -0.329 | -0.159 | -0.487                     | -0.328 |
| <b>C<sub>3</sub></b>   | 0.000                                         | 0.069                      | 0.069  | 0.001  | 0.053                      | 0.052  |
| <b>C<sub>2</sub></b>   | -0.187                                        | -0.223                     | -0.036 | -0.187 | -0.203                     | -0.016 |
| <b>Total HMBPP</b>     | -0.121                                        | -0.506                     | -0.385 | -0.121 | -0.603                     | -0.482 |
| <b>Cluster + HMBPP</b> | -0.859                                        | -1.848                     | -0.989 | -0.859 | -1.818                     | -0.959 |

**Table S8.** Relative energies (kcal mol<sup>-1</sup>) of tight versus loose  $\eta^2$ -complexes in the 1e<sup>-</sup> reduced state.

|                                                                  | DFT/COSMO<br>E <sup>"Loose"</sup> - E <sup>"Tight"</sup> | DFT/SCRF<br>E <sup>"Loose"</sup> - E <sup>"Tight"</sup> |
|------------------------------------------------------------------|----------------------------------------------------------|---------------------------------------------------------|
| RO <sup>H</sup> P <sup>-</sup> E <sup>H</sup> ( $\eta^2$ -ring)  | 7.8                                                      | 8.8                                                     |
| RO <sup>H</sup> P <sup>H</sup> E <sup>H</sup> ( $\eta^2$ -ring)  | 13.5                                                     | 11.2                                                    |
| RO <sup>H</sup> P <sup>-</sup> E <sup>H</sup> ( $\eta^2$ -trans) | 9.0                                                      | 7.0                                                     |
| RO <sup>H</sup> P <sup>H</sup> E <sup>H</sup> ( $\eta^2$ -trans) | 10.2                                                     | 8.8                                                     |

**Table S9.** Relative energies (kcal mol<sup>-1</sup>) of all valence isomers considered for 1e<sup>-</sup> reduced  $\eta^2$ -bound states.

|                                                                  | Relative energies |          |                                                                             | Relative energies |            |
|------------------------------------------------------------------|-------------------|----------|-----------------------------------------------------------------------------|-------------------|------------|
|                                                                  | DFT/COSMO         | DFT/SCRF |                                                                             | DFT/COSMO         | DFT/SCRF   |
| <b>RO<sup>-</sup>P<sup>-</sup>E<sup>H</sup> (RO<sup>-</sup>)</b> |                   |          | <b>RO<sup>H</sup>P<sup>-</sup>E<sup>H</sup> (<math>\eta^2</math>-ring)</b>  |                   |            |
| $\beta\alpha\beta\alpha$                                         | 39.8              | 21.1     | $\beta\alpha\beta\alpha$                                                    | 11.8              | 0.7        |
| $\beta\alpha\alpha\beta$                                         | 40.5              | 19.4     | $\beta\alpha\alpha\beta$                                                    | 10.9              | <b>0.0</b> |
| $\alpha\beta\beta\alpha$                                         | 40.1              | 18.8     | $\alpha\beta\beta\alpha$                                                    | 19.7              | 8.8        |
| $\alpha\alpha\beta\beta$                                         | 39.8              | 20.6     | $\alpha\alpha\beta\beta$                                                    | 18.7              | 8.8        |
| <b>RO<sup>-</sup>P<sup>H</sup>E<sup>H</sup> (RO<sup>-</sup>)</b> |                   |          | <b>RO<sup>H</sup>P<sup>H</sup>E<sup>H</sup> (<math>\eta^2</math>-ring)</b>  |                   |            |
| $\beta\alpha\beta\alpha$                                         | 29.5              | 19.8     | $\beta\alpha\beta\alpha$                                                    | <b>0.0</b>        | 4.9        |
| $\beta\alpha\alpha\beta$                                         | 27.1              | 16.0     | $\beta\alpha\alpha\beta$                                                    | 2.4               | 2.3        |
| $\alpha\beta\beta\alpha$                                         | 26.9              | 22.5     | $\alpha\beta\beta\alpha$                                                    | 13.5              | 13.7       |
| $\alpha\alpha\beta\beta$                                         | 29.9              | 18.6     | $\alpha\alpha\beta\beta$                                                    | 13.5              | 13.5       |
| <b>RO<sup>H</sup>P<sup>-</sup>E<sup>-</sup> (ROH)</b>            |                   |          | <b>RO<sup>H</sup>P<sup>-</sup>E<sup>H</sup> (<math>\eta^2</math>-trans)</b> |                   |            |
| $\beta\alpha\beta\alpha$                                         | 27.9              | 14.1     | $\beta\alpha\beta\alpha$                                                    | 16.7              | 7.3        |
| $\beta\alpha\alpha\beta$                                         | 27.9              | 10.8     | $\beta\alpha\alpha\beta$                                                    | 17.2              | 7.2        |
| $\alpha\beta\beta\alpha$                                         | 30.5              | 9.8      | $\alpha\beta\beta\alpha$                                                    | 26.1              | 14.6       |
| $\alpha\alpha\beta\beta$                                         | 40.2              | 17.3     | $\alpha\alpha\beta\beta$                                                    | 25.7              | 14.2       |
| <b>RO<sup>H</sup>P<sup>H</sup>E<sup>-</sup> (ROH)</b>            |                   |          | <b>RO<sup>H</sup>P<sup>H</sup>E<sup>H</sup> (<math>\eta^2</math>-trans)</b> |                   |            |
| $\beta\alpha\beta\alpha$                                         | 17.0              | 11.7     | $\beta\alpha\beta\alpha$                                                    | 8.8               | 9.3        |
| $\beta\alpha\alpha\beta$                                         | 16.1              | 5.7      | $\beta\alpha\alpha\beta$                                                    | 9.9               | 10.1       |
| $\alpha\beta\beta\alpha$                                         | 27.0              | 15.2     | $\alpha\beta\beta\alpha$                                                    | 21.7              | 21.1       |
| $\alpha\alpha\beta\beta$                                         | 26.5              | 15.8     | $\alpha\alpha\beta\beta$                                                    | 19.0              | 18.1       |
| <b>RO<sup>H</sup>P<sup>-</sup>E<sup>H</sup> (ROH)</b>            |                   |          |                                                                             |                   |            |
| $\beta\alpha\beta\alpha$                                         | 17.0              | 7.8      |                                                                             |                   |            |
| $\beta\alpha\alpha\beta$                                         | 15.6              | 6.0      |                                                                             |                   |            |
| $\alpha\beta\beta\alpha$                                         | 17.6              | 7.7      |                                                                             |                   |            |
| $\alpha\alpha\beta\beta$                                         | 20.4              | 9.9      |                                                                             |                   |            |
| <b>RO<sup>H</sup>P<sup>H</sup>E<sup>H</sup> (ROH)</b>            |                   |          |                                                                             |                   |            |
| $\beta\alpha\beta\alpha$                                         | 11.2              | 11.6     |                                                                             |                   |            |
| $\beta\alpha\alpha\beta$                                         | 10.3              | 10.3     |                                                                             |                   |            |
| $\alpha\beta\beta\alpha$                                         | 12.5              | 11.5     |                                                                             |                   |            |
| $\alpha\alpha\beta\beta$                                         | 14.9              | 14.7     |                                                                             |                   |            |

**Table S10.** Geometric parameters compared between ROH- and  $\eta^2$ -ring geometries in both the oxidized and  $1e^-$  reduced RO<sup>HPHE</sup>H states. Bond lengths are shown in Å.

| Binding mode<br>Valence isomer                                  | OXIDIZED            |                          |                          |                          | REDUCED                  |                          |
|-----------------------------------------------------------------|---------------------|--------------------------|--------------------------|--------------------------|--------------------------|--------------------------|
|                                                                 | ROH                 | ROH                      | $\eta^2$ -ring           |                          | $\eta^2$ -ring           |                          |
|                                                                 | $\alpha\alpha\beta$ | $\beta\alpha\alpha\beta$ | $\alpha\alpha\beta\beta$ | $\beta\alpha\alpha\beta$ | $\alpha\alpha\beta\beta$ | $\beta\alpha\alpha\beta$ |
| <b>Cluster bond lengths:</b>                                    |                     |                          |                          |                          |                          |                          |
| Fe1 – S1                                                        | 2.292               | 2.251                    | 2.288                    | 2.196                    | 2.315                    | 2.295                    |
| Fe1 – S2                                                        | 2.285               | 2.268                    | 2.270                    | 2.271                    | 2.281                    | 2.280                    |
| Fe1 – S3                                                        | 2.227               | 2.325                    | 2.221                    | 2.295                    | 2.230                    | 2.372                    |
| Fe2 – S1                                                        | 2.332               | 2.343                    | 2.335                    | 2.312                    | 2.343                    | 2.323                    |
| Fe2 – S2                                                        | 2.294               | 2.215                    | 2.304                    | 2.195                    | 2.303                    | 2.197                    |
| Fe2 – S4                                                        | 2.274               | 2.391                    | 2.253                    | 2.353                    | 2.269                    | 2.368                    |
| Fe3 – S1                                                        | 2.251               | 2.333                    | 2.231                    | 2.300                    | 2.259                    | 2.314                    |
| Fe3 – S3                                                        | 2.322               | 2.255                    | 2.328                    | 2.263                    | 2.329                    | 2.266                    |
| Fe3 – S4                                                        | 2.357               | 2.382                    | 2.353                    | 2.352                    | 2.359                    | 2.367                    |
| Fe4 – S2                                                        | 2.292               | 2.326                    | 2.228                    | 2.313                    | 2.278                    | 2.311                    |
| Fe4 – S3                                                        | 2.323               | 2.310                    | 2.323                    | 2.332                    | 2.334                    | 2.308                    |
| Fe4 – S4                                                        | 2.351               | 2.296                    | 2.334                    | 2.228                    | 2.336                    | 2.249                    |
| Fe2 – S <sub>C12</sub>                                          | 2.332               | 2.311                    | 2.260                    | 2.239                    | 2.319                    | 2.288                    |
| Fe3 – S <sub>C197</sub>                                         | 2.289               | 2.324                    | 2.261                    | 2.274                    | 2.296                    | 2.357                    |
| Fe4 – S <sub>C96</sub>                                          | 2.306               | 2.353                    | 2.281                    | 2.277                    | 2.292                    | 2.307                    |
| <b>HMBPP bond lengths:</b>                                      |                     |                          |                          |                          |                          |                          |
| Fe1 – O <sub>C4</sub>                                           | 2.376               | 2.282                    | 4.536                    | 4.540                    | 4.531                    | 4.283                    |
| Fe1 – C <sub>3</sub>                                            | 3.318               | 3.241                    | 2.601                    | 2.638                    | 2.526                    | 2.139                    |
| Fe1 – C <sub>2</sub>                                            | 3.482               | 3.431                    | 2.529                    | 2.561                    | 2.468                    | 2.116                    |
| <b>H-bond lengths:</b>                                          |                     |                          |                          |                          |                          |                          |
| O <sub>C4</sub> – O <sub>T167</sub>                             | 3.173               | 3.161                    | 4.324                    | 4.297                    | 4.333                    | 4.345                    |
| O <sub>T167</sub> – O <sub>E126</sub>                           | 2.658               | 2.653                    | 2.705                    | 2.712                    | 2.724                    | 2.710                    |
| O <sub>E126</sub> – O <sub>W1</sub>                             | 3.773               | 3.740                    | 3.717                    | 3.704                    | 3.799                    | 3.750                    |
| O <sub>W1</sub> – O <sub>PPi</sub>                              | 2.842               | 2.841                    | 2.863                    | 2.950                    | 2.994                    | 3.005                    |
| O <sub>C4</sub> – O <sub>E126</sub>                             | 4.155               | 4.155                    | 3.604                    | 3.586                    | 3.590                    | 3.644                    |
| O <sub>C4</sub> – O <sub>PPi</sub>                              | 4.850               | 4.861                    | 2.727                    | 2.759                    | 2.783                    | 2.787                    |
| <b>HMBPP angle</b>                                              |                     |                          |                          |                          |                          |                          |
| C <sub>2</sub> –C <sub>3</sub> –C <sub>4</sub> –O <sub>C4</sub> | –98.8               | –99.3                    | 99.4                     | 100.3                    | 101.2                    | 94.7                     |

**Table S11.** Comparison of NSPs computed for  $\eta^2$ -ring geometries in the oxidized and  $1e^-$  reduced  $\text{RO}^{\text{H}}\text{P}^{\text{H}}\text{E}^{\text{H}}$  states.

|                        | $\text{RO}^{\text{H}}\text{P}^{\text{H}}\text{E}^{\text{H}}$ |                       |                    |                          |                       |                    |
|------------------------|--------------------------------------------------------------|-----------------------|--------------------|--------------------------|-----------------------|--------------------|
|                        | $\alpha\alpha\beta\beta$                                     |                       |                    | $\beta\alpha\alpha\beta$ |                       |                    |
|                        | Ox ( $\eta^2$ -ring)                                         | Red ( $\eta^2$ -ring) | $\Delta\text{NSP}$ | Ox ( $\eta^2$ -ring)     | Red ( $\eta^2$ -ring) | $\Delta\text{NSP}$ |
| <b>FE1</b>             | 3.167                                                        | 3.224                 | 0.057              | -3.122                   | -2.865                | 0.257              |
| <b>FE2</b>             | 3.215                                                        | 3.289                 | 0.074              | 3.104                    | 3.200                 | 0.096              |
| <b>FE3</b>             | -3.188                                                       | -3.121                | 0.067              | 3.182                    | 3.327                 | 0.146              |
| <b>FE4</b>             | -3.194                                                       | -2.849                | 0.345              | -3.202                   | -3.197                | 0.005              |
| <b>Sum</b>             | 0.000                                                        | 0.542                 | 0.542              | -0.038                   | 0.466                 | 0.504              |
| <b>S1</b>              | 0.098                                                        | 0.159                 | 0.061              | 0.001                    | 0.216                 | 0.215              |
| <b>S2</b>              | 0.129                                                        | 0.276                 | 0.147              | -0.067                   | -0.048                | 0.019              |
| <b>S3</b>              | -0.022                                                       | 0.022                 | 0.044              | -0.104                   | -0.028                | 0.076              |
| <b>S4</b>              | -0.073                                                       | -0.008                | 0.065              | 0.029                    | 0.047                 | 0.018              |
| <b>Sum</b>             | 0.132                                                        | 0.450                 | 0.318              | -0.140                   | 0.187                 | 0.328              |
| <b>C12</b>             | 0.253                                                        | 0.185                 | -0.068             | 0.244                    | 0.190                 | -0.054             |
| <b>C96</b>             | -0.196                                                       | -0.086                | 0.110              | -0.226                   | -0.156                | 0.069              |
| <b>C197</b>            | -0.212                                                       | -0.116                | 0.096              | 0.186                    | 0.143                 | -0.043             |
| <b>Sum</b>             | -0.155                                                       | -0.017                | 0.137              | 0.205                    | 0.176                 | -0.028             |
| <b>Total cluster</b>   | -0.022                                                       | 0.975                 | 0.997              | 0.026                    | 0.830                 | 0.803              |
| <b>O<sub>C4</sub></b>  | 0.006                                                        | 0.005                 | -0.001             | -0.006                   | 0.002                 | 0.008              |
| <b>C<sub>3</sub></b>   | -0.006                                                       | -0.008                | -0.002             | -0.001                   | 0.115                 | 0.116              |
| <b>C<sub>2</sub></b>   | 0.029                                                        | 0.029                 | 0.000              | -0.015                   | 0.063                 | 0.078              |
| <b>Total HMBPP</b>     | 0.025                                                        | 0.021                 | -0.004             | -0.023                   | 0.169                 | 0.191              |
| <b>Cluster + HMBPP</b> | 0.002                                                        | 0.996                 | 0.993              | 0.003                    | 0.998                 | 0.995              |



**Table S12.** Comparison of ESP charges computed for  $\eta^2$ -ring geometries in the oxidized and  $1e^-$  reduced  $\text{RO}^{\text{H}}\text{P}^{\text{H}}\text{E}^{\text{H}}$  states.

|                        | $\text{RO}^{\text{H}}\text{P}^{\text{H}}\text{E}^{\text{H}}$ |                       |            |                          |                       |            |
|------------------------|--------------------------------------------------------------|-----------------------|------------|--------------------------|-----------------------|------------|
|                        | $\alpha\alpha\beta\beta$                                     |                       |            | $\beta\alpha\alpha\beta$ |                       |            |
|                        | Ox ( $\eta^2$ -ring)                                         | Red ( $\eta^2$ -ring) | $\Delta q$ | Ox ( $\eta^2$ -ring)     | Red ( $\eta^2$ -ring) | $\Delta q$ |
| <b>FE1</b>             | 0.382                                                        | 0.349                 | -0.034     | 0.375                    | 0.292                 | -0.083     |
| <b>FE2</b>             | 0.479                                                        | 0.563                 | 0.085      | 0.473                    | 0.538                 | 0.065      |
| <b>FE3</b>             | 0.579                                                        | 0.615                 | 0.036      | 0.599                    | 0.661                 | 0.062      |
| <b>FE4</b>             | 0.484                                                        | 0.514                 | 0.031      | 0.469                    | 0.509                 | 0.040      |
| <b>Sum</b>             | 1.923                                                        | 2.041                 | 0.118      | 1.916                    | 1.999                 | 0.083      |
| <b>S1</b>              | -0.467                                                       | -0.583                | -0.116     | -0.455                   | -0.578                | -0.122     |
| <b>S2</b>              | -0.282                                                       | -0.319                | -0.037     | -0.276                   | -0.264                | 0.011      |
| <b>S3</b>              | -0.449                                                       | -0.565                | -0.116     | -0.447                   | -0.565                | -0.118     |
| <b>S4</b>              | -0.547                                                       | -0.735                | -0.189     | -0.543                   | -0.673                | -0.130     |
| <b>Sum</b>             | -1.744                                                       | -2.202                | -0.458     | -1.721                   | -2.080                | -0.359     |
| <b>C12</b>             | -0.257                                                       | -0.404                | -0.147     | -0.246                   | -0.371                | -0.125     |
| <b>C96</b>             | -0.288                                                       | -0.469                | -0.180     | -0.291                   | -0.386                | -0.095     |
| <b>C197</b>            | -0.321                                                       | -0.445                | -0.124     | -0.347                   | -0.446                | -0.099     |
| <b>Sum</b>             | -0.866                                                       | -1.318                | -0.452     | -0.885                   | -1.204                | -0.319     |
| <b>Total cluster</b>   | -0.687                                                       | -1.479                | -0.792     | -0.689                   | -1.284                | -0.595     |
| <b>O<sub>C4</sub></b>  | -0.341                                                       | -0.330                | 0.011      | -0.333                   | -0.349                | -0.016     |
| <b>C<sub>3</sub></b>   | -0.069                                                       | -0.113                | -0.044     | -0.077                   | -0.113                | -0.036     |
| <b>C<sub>2</sub></b>   | 0.002                                                        | 0.048                 | 0.046      | 0.000                    | 0.021                 | 0.020      |
| <b>Total HMBPP</b>     | -0.141                                                       | -0.269                | -0.128     | -0.206                   | -0.435                | -0.229     |
| <b>Cluster + HMBPP</b> | -0.829                                                       | -1.748                | -0.920     | -0.895                   | -1.719                | -0.824     |

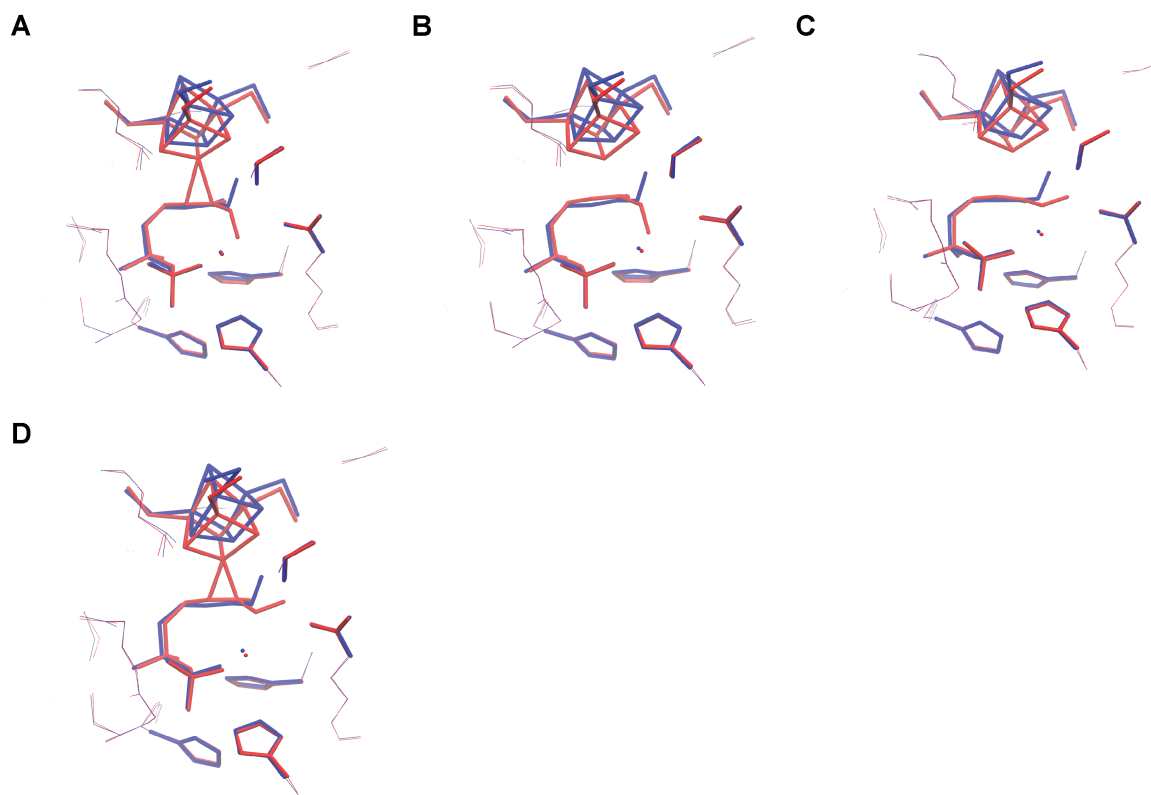

**Fig. S1.** Superposition of ROH<sup>-</sup> (blue) and  $\eta^2$ - (red) bound geometries in the  $1e^-$  reduced state. (A) The RO<sup>H</sup>P-E<sup>H</sup>(ROH)  $\beta\alpha\alpha\beta$  and RO<sup>H</sup>P-E<sup>H</sup>( $\eta^2$ -ring)  $\beta\alpha\alpha\beta$  states; (B) the RO<sup>H</sup>P-E<sup>H</sup>(ROH)  $\alpha\beta\beta\alpha$  and RO<sup>H</sup>P-E<sup>H</sup>( $\eta^2$ -ring)  $\alpha\beta\beta\alpha$  states; (C) the RO<sup>H</sup>P-E<sup>H</sup>(ROH)  $\alpha\beta\beta\alpha$  and RO<sup>H</sup>P-E<sup>H</sup>( $\eta^2$ -trans)  $\alpha\beta\beta\alpha$  states; (D) the RO<sup>H</sup>P-E<sup>H</sup>(ROH)  $\beta\alpha\alpha\beta$  and RO<sup>H</sup>P-E<sup>H</sup>( $\eta^2$ -trans)  $\beta\alpha\alpha\beta$  states. While  $\beta\alpha\beta\alpha$  and  $\alpha\alpha\beta\beta$  states are omitted from this figure, their respective properties and geometries are similar to the  $\beta\alpha\alpha\beta$  and  $\alpha\beta\beta\alpha$  shown above.
